# Supplementary material
Source: PubMed Central journal article supplement (PMC8446308)
Supplement: NIHMS1709413-supplement-Supplemental_Digital_Content_1.pdf [file NIHMS1709413-supplement-Supplemental_Digital_Content_1.pdf]

**Table, Supplemental Digital Content 1.** Variables used to create propensity-matched comparison group

| Category                                 | Variable                                                                                                                                                                                                                                                                                                                                                                                                      |
|------------------------------------------|---------------------------------------------------------------------------------------------------------------------------------------------------------------------------------------------------------------------------------------------------------------------------------------------------------------------------------------------------------------------------------------------------------------|
| Demographic                              | Age<br>Gender<br>Geographic region<br>Race/ethnicity                                                                                                                                                                                                                                                                                                                                                          |
| Diagnosis                                | Asthma<br>Bipolar disorder<br>Cerebrovascular disease<br>Chronic kidney disease<br>Chronic obstructive pulmonary disease<br>Coronary artery disease<br>Dementia<br>Depression<br>Diabetes<br>Hepatitis<br>Human immunodeficiency virus<br>Hypertension<br>Impulse control disorder<br>Personality disorder<br>Peripheral vascular disease<br>Schizophrenia<br>Severe mental illness<br>Substance use disorder |
| Past 3 and 12 month Medicaid utilization | Emergency department visits, any<br>Emergency department visits, count<br>Inpatient visits, any<br>Inpatient visits, count<br>Outpatient visits, any<br>Outpatient visits, count                                                                                                                                                                                                                              |
| Past 12 month Medicaid utilization       | Total Medicaid <b>spending</b> , USD<br>Months of Medicaid eligibility                                                                                                                                                                                                                                                                                                                                        |
