# Supplementary material
Source: PubMed Central journal article supplement (PMC8446308)
Supplement: NIHMS1709413-supplement-Supplemental_Digital_Content_3.pdf [file NIHMS1709413-supplement-Supplemental_Digital_Content_3.pdf]

**Table, Supplemental Digital Content 3.** Balance after matching among individuals identified as having diabetes

| Variable                                    | HH enrolled<br>(N=19,799) | Comparison<br>(N=17,461) | Standardized<br>difference |
|---------------------------------------------|---------------------------|--------------------------|----------------------------|
| Gender (%)                                  |                           |                          |                            |
| Male                                        | 39.8%                     | 41.9%                    | 0.04                       |
| Race/ethnicity (%)                          |                           |                          |                            |
| White, non-Hispanic                         | 31.9%                     | 32.4%                    | 0.01                       |
| Black, non-Hispanic                         | 39.2%                     | 39.1%                    | 0.00                       |
| Hispanic                                    | 12.7%                     | 15.1%                    | 0.07                       |
| Residence (%)                               |                           |                          |                            |
| NYC                                         | 64.0%                     | 63.3%                    | 0.02                       |
| Comorbidities (%)                           |                           |                          |                            |
| Asthma                                      | 33.4%                     | 33.7%                    | 0.01                       |
| <b>Coronary Artery Disease</b>              | 54.5%                     | 54.7%                    | 0.00                       |
| Bipolar                                     | 11.1%                     | 11.3%                    | 0.00                       |
| Schizophrenia                               | 12.9%                     | 14.5%                    | 0.05                       |
| HIV                                         | 35.0%                     | 24.7%                    | 0.23                       |
| SUD                                         | 39.1%                     | 44.0%                    | 0.10                       |
| Age, mean (SD)                              | 51.2 (10.4)               | 52.1 (9.9)               | 0.09                       |
| Service utilization, mean (SD) <sup>a</sup> |                           |                          |                            |
| ED visits                                   | 2.4 (5.5)                 | 2.1 (6.2)                | -0.05                      |
| Hospital visits                             | 0.9 (2.4)                 | 0.8 (2.0)                | -0.06                      |
| Outpatient visits                           | 26.8 (40.7)               | 27.0 (40.5)              | 0.00                       |
| Medicaid <b>spending</b> , USD <sup>a</sup> |                           |                          |                            |
| Mean (SD)                                   | 41,109.6 (48,115.6)       | 45,162.2 (54,528.4)      | 0.08                       |
| Median                                      | 26,153.5                  | 26,566.4                 |                            |

<sup>a</sup>In the past 12 months

HH=Health Homes; NYC=New York City; HIV=human immunodeficiency virus; SUD=substance use disorder; ED=emergency department
